# Supplementary material
Source: Elsevier journal article supplement (https://www.sciencedirect.com/science/article/pii/S2173574317300060)
Supplement: mmc1 [file S2173574317300060:mmc1.docx]

**Material suplementario**. Ejemplos de verbatims recogidos, clasificados por categorías.

| **Barreras al ejercicio físico** | |
| --- | --- |
| V1 | "Una vez me caí haciendo pilates (...), que no vuelvo, vamos". "Cuando veo que es más paliza que beneficio lo dejo (...) es que no puedo llevar el ritmo" |
| V2 | "Es que no saben (los monitores) qué hacer contigo y te ponen a un lado,... vamos que no te controlan y los haces mal (los ejercicios)". “Es que tiene que estar súper individualizado, que está claro que a cada uno nos atrae una cosa". |
| V3 | "Yo es que me tengo que apoyar en mis amigos, aunque a veces ellos hagan menos ejercicio que yo, pero me obliga a salir a la calle". "Por ejemplo, en verano, que te tiras dos meses sin ir al gimnasio, no hay quien quiera empezar" |
| **Facilitadores al ejercicio físico** | |
| V4 | "Por ejemplo, un buen fisio entrenado, que trabaje para las asociaciones" |
| V5 | "Saber dónde hacer el ejercicio, tener a mano un buen gimnasio o una piscina es fundamental, es que no te vas a cruzar Madrid para ir a un sitio guay (...) lo haces los primeros días y pare usted de contar" |
| V6 | "En esto hay que esforzarse, eso lo sabemos todos, no vale con apuntarse al gimnasio", "Yo hay gente que no sé por qué se apunta". |
| V7 | "Te distraes", "Te lo pasas bien", "No piensas en lo mal que estás" |
| V8 | "Vamos a ver, si no asumes lo que tienes, no vas a avanzar"; "Tenemos que mentalizarnos, dependen de ello nuestras posibilidades" |
| V9 | “Aunque no hay que dejarlo y es importante siempre, si empiezas pronto, es más fácil que lo metas en la rutina”. |
| V10 | “El saber el efecto que sobre el propio cuerpo tiene el ejercicio, motiva a seguir haciéndolo”. "¡Yo es que ahora estoy más flexible que la gente de mi edad sin la enfermedad!". "Es que el ejercicio te cambia el humor y eso tu entorno lo nota" |
| El papel de las asociaciones | |
| V11 | *"Por ejemplo, un buen fisio entrenado, que trabaje para las asociaciones".* |
| V12 | *"Las asociaciones podrían ayudar a formar a los monitores"* |
| **Elementos discordantes** | |
| V13 | "Cuando estoy estresada, por lo que sea (...) no puedo hacer ejercicio", "Pues (hablando del marido, también con EsA) cuando le veo estresado, le empujo a la calle, ¡eah, a la bici!" |
| V14 | "El tiempo se saca, porque sabes que lo ganas", "Ya, pero si me tengo que ocupar de mis hijas, no puedo ir al gimnasio” |
| V15 | "Las tablas no se entienden", "Son aburridas", "Te las dan sin explicación", "Yo sin monitor, paso", "Se pueden hacer mal las tablas", *“Hombre, para cuando no puedes salir o el gimnasio está cerrado…”,* "No sé, a lo mejor si el vídeo [se barajó esa posibilidad] es bueno, puede ser útil", |
| V16 | "Es que a veces te da igual que pagues o que no"; "Bueno, a veces la gente no aprecia lo que es gratis"; "Hay que aguantarse con los fisios o con los monitores que haya, a más especializado, más caro" |
| Fases del afrontamiento del ejercicio o actividad física en la EsA. | |
| V17 | "No quería hacer nada", "¿Yo?¿Por libre?" |
| V18 | "Haces lo que te digan, te involucras a tope, quieres curarte, y con ejercicio lo haces tú, no te lo hacen"; "Empiezas a hacerlos". |
| V19 | Tengo que mirar por mi"; "Pasas a querer darlo todo" |
| V20 | "Cuando te da el brote, te acuerdas", "Durante un tiempo, fallo menos" "Procuro centrarme en la higiene postural en los brotes", "(en los brotes...) lo que haces es movilizarte" "Durante el brote no quedarse quieto". |
